# Supplementary material for: Peer mentoring experience on becoming a good doctor: student perspectives
Source: PubMed Central journal article supplement (PMC7720515; doi:10.1186/s12909-020-02408-7), 2020-12-07
Supplement: 12909_2020_2408_MOESM1_ESM.pdf [file 12909_2020_2408_MOESM1_ESM.pdf]

## Pre-Test Questionnaire

| Question                                                                                                                | Likert Scale   |       |         |          |                   |
|-------------------------------------------------------------------------------------------------------------------------|----------------|-------|---------|----------|-------------------|
|                                                                                                                         | 5              | 4     | 3       | 2        | 1                 |
|                                                                                                                         | Strongly Agree | Agree | Neutral | Disagree | Strongly Disagree |
| 1. I have the effective oral and written skills to engage with the students and peers                                   |                |       |         |          |                   |
| 2. I have the abilities to create an effective learning environment                                                     |                |       |         |          |                   |
| 3. I have the skills to develop interaction and collaborations amongst the students                                     |                |       |         |          |                   |
| 4. I have the effective teamwork and leadership skills to manage the student groups and peers                           |                |       |         |          |                   |
| 5. I have the interpersonal and critical thinking skills                                                                |                |       |         |          |                   |
| 6. I have the effective stress and time management skills                                                               |                |       |         |          |                   |
| 7. I have the ability to welcome and learn new skills                                                                   |                |       |         |          |                   |
| 8. I have the innovative thinking and problem-solving abilities to make an effective peer teaching/facilitation session |                |       |         |          |                   |
| 9. I can plan and organize the teaching sessions as per the timeline                                                    |                |       |         |          |                   |
| 10. I have the effective learning strategies/methods to facilitate the teaching sessions effectively                    |                |       |         |          |                   |
| 11. My teaching strategies will help to develop independent and collaborative learning amongst the students             |                |       |         |          |                   |
| 12. I have the ability to provide constructive feedback on student learning                                             |                |       |         |          |                   |
