# Supplementary material for: Peer mentoring experience on becoming a good doctor: student perspectives
Source: PubMed Central journal article supplement (PMC7720515; doi:10.1186/s12909-020-02408-7), 2020-12-07
Supplement: 12909_2020_2408_MOESM2_ESM.pdf [file 12909_2020_2408_MOESM2_ESM.pdf]

## Post-Test Questionnaire

| Question                                                                                      | Likert Scale   |       |         |          |                   |
|-----------------------------------------------------------------------------------------------|----------------|-------|---------|----------|-------------------|
|                                                                                               | 5              | 4     | 3       | 2        | 1                 |
|                                                                                               | Strongly Agree | Agree | Neutral | Disagree | Strongly Disagree |
| 1. My oral and written skills to engage with students and peers have improved                 |                |       |         |          |                   |
| 2. My ability to create an effective learning environment have improved                       |                |       |         |          |                   |
| 3. My skills to develop interaction and collaborations amongst the students have improved     |                |       |         |          |                   |
| 4. My teamwork and leadership skills have improved                                            |                |       |         |          |                   |
| 5. My interpersonal and critical thinking skills have become better                           |                |       |         |          |                   |
| 6. My stress and time management skills have improved                                         |                |       |         |          |                   |
| 7. My ability to welcome and learn new skills has enhanced                                    |                |       |         |          |                   |
| 8. My innovative thinking and problem-solving abilities in peer teaching have strengthened    |                |       |         |          |                   |
| 9. My skill on planning and organising the teaching sessions as per the timeline is better    |                |       |         |          |                   |
| 10. My learning strategies/skills to facilitate the teaching sessions have improved           |                |       |         |          |                   |
| 11. My teaching strategies to develop independent learning amongst the students have improved |                |       |         |          |                   |
| 12. My ability to provide constructive feedback on student learning have improved             |                |       |         |          |                   |
