# Supplementary material for: Peer mentoring experience on becoming a good doctor: student perspectives
Source: PubMed Central journal article supplement (PMC7720515; doi:10.1186/s12909-020-02408-7), 2020-12-07
Supplement: 12909_2020_2408_MOESM3_ESM.pdf [file 12909_2020_2408_MOESM3_ESM.pdf]

## List of Questions for Structured Interview

---

### Question

- 
1. Does the PASS leaders experience will help in working with diverse group of people?

---

  2. The experiences in PASS sessions prepared me for work readiness and commitment to lifelong learning for patient practice.

---

  3. Does the management skill acquired will help in community management or engagement?

---

  4. The interpersonal and critical thinking skills acquired will help in clinical practice?

---

  5. Does the skill acquired to create an effective learning environment will help in patient interaction/management?

---

  6. Does the skills acquired to provide an effective and constructive feedback will help in patient practice?

---

  7. Does the improved communication skills will help in handling/managing the patient and peers?

---

  8. Any additional skills required?
-
